# Supplementary material for: Integrated proteogenomic and metabolomic characterization of papillary thyroid cancer with different recurrence risks
Source: Research Square preprint supplement (doi:10.21203/rs.3.rs-3036564/v1), 2023-06-16
Supplement: Supplementary file 1 [file a0eab462ab2deeaada12d264.docx]

**Supplementary materials**

**Supplementary Figures**


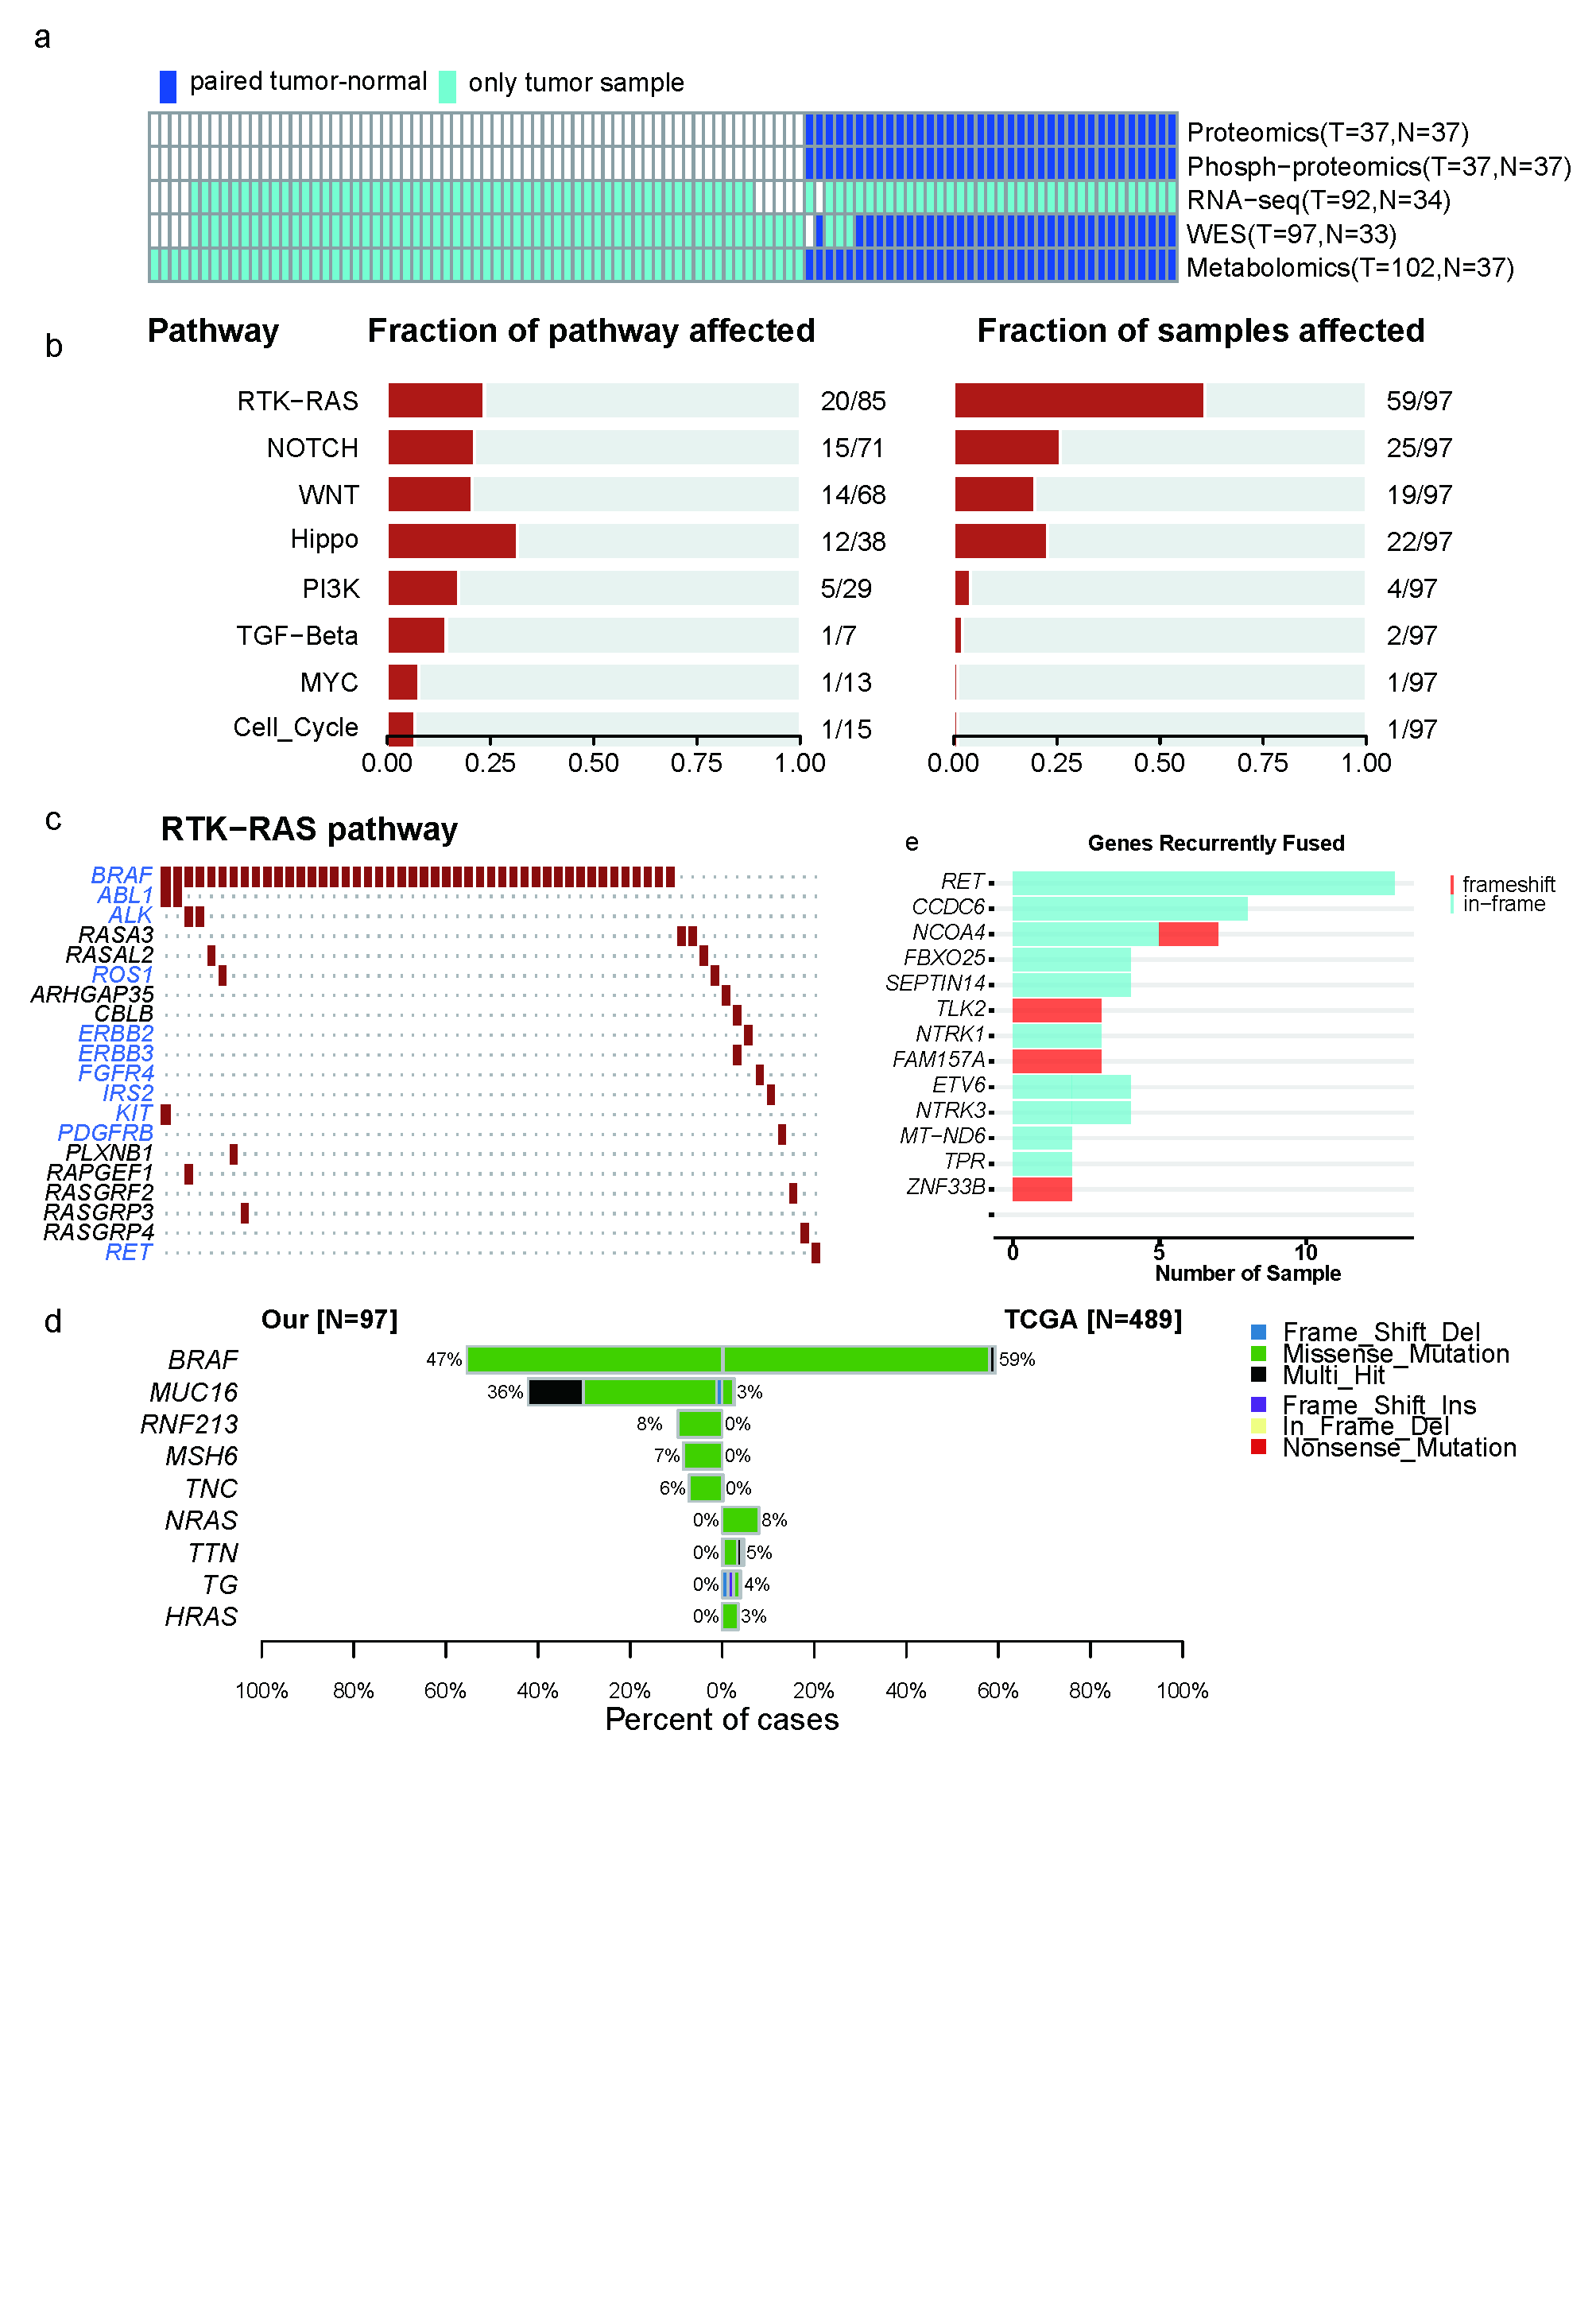
**Fig S1. Genetic profile of the thyroid cancer patients with different recurrent risk.**

a. Pathways affected by the somatic mutation genes (SMGs).b. The mutation profiles in the RTK-RAS pathway. The red grid represents one gene is mutated in a samle.c. Comparision of the SMG in our cohort and the TCGA-THCA dataset.d. The copy number variation between tumor and normal samples.e. The genes recurrently fused based on the gene fusion results


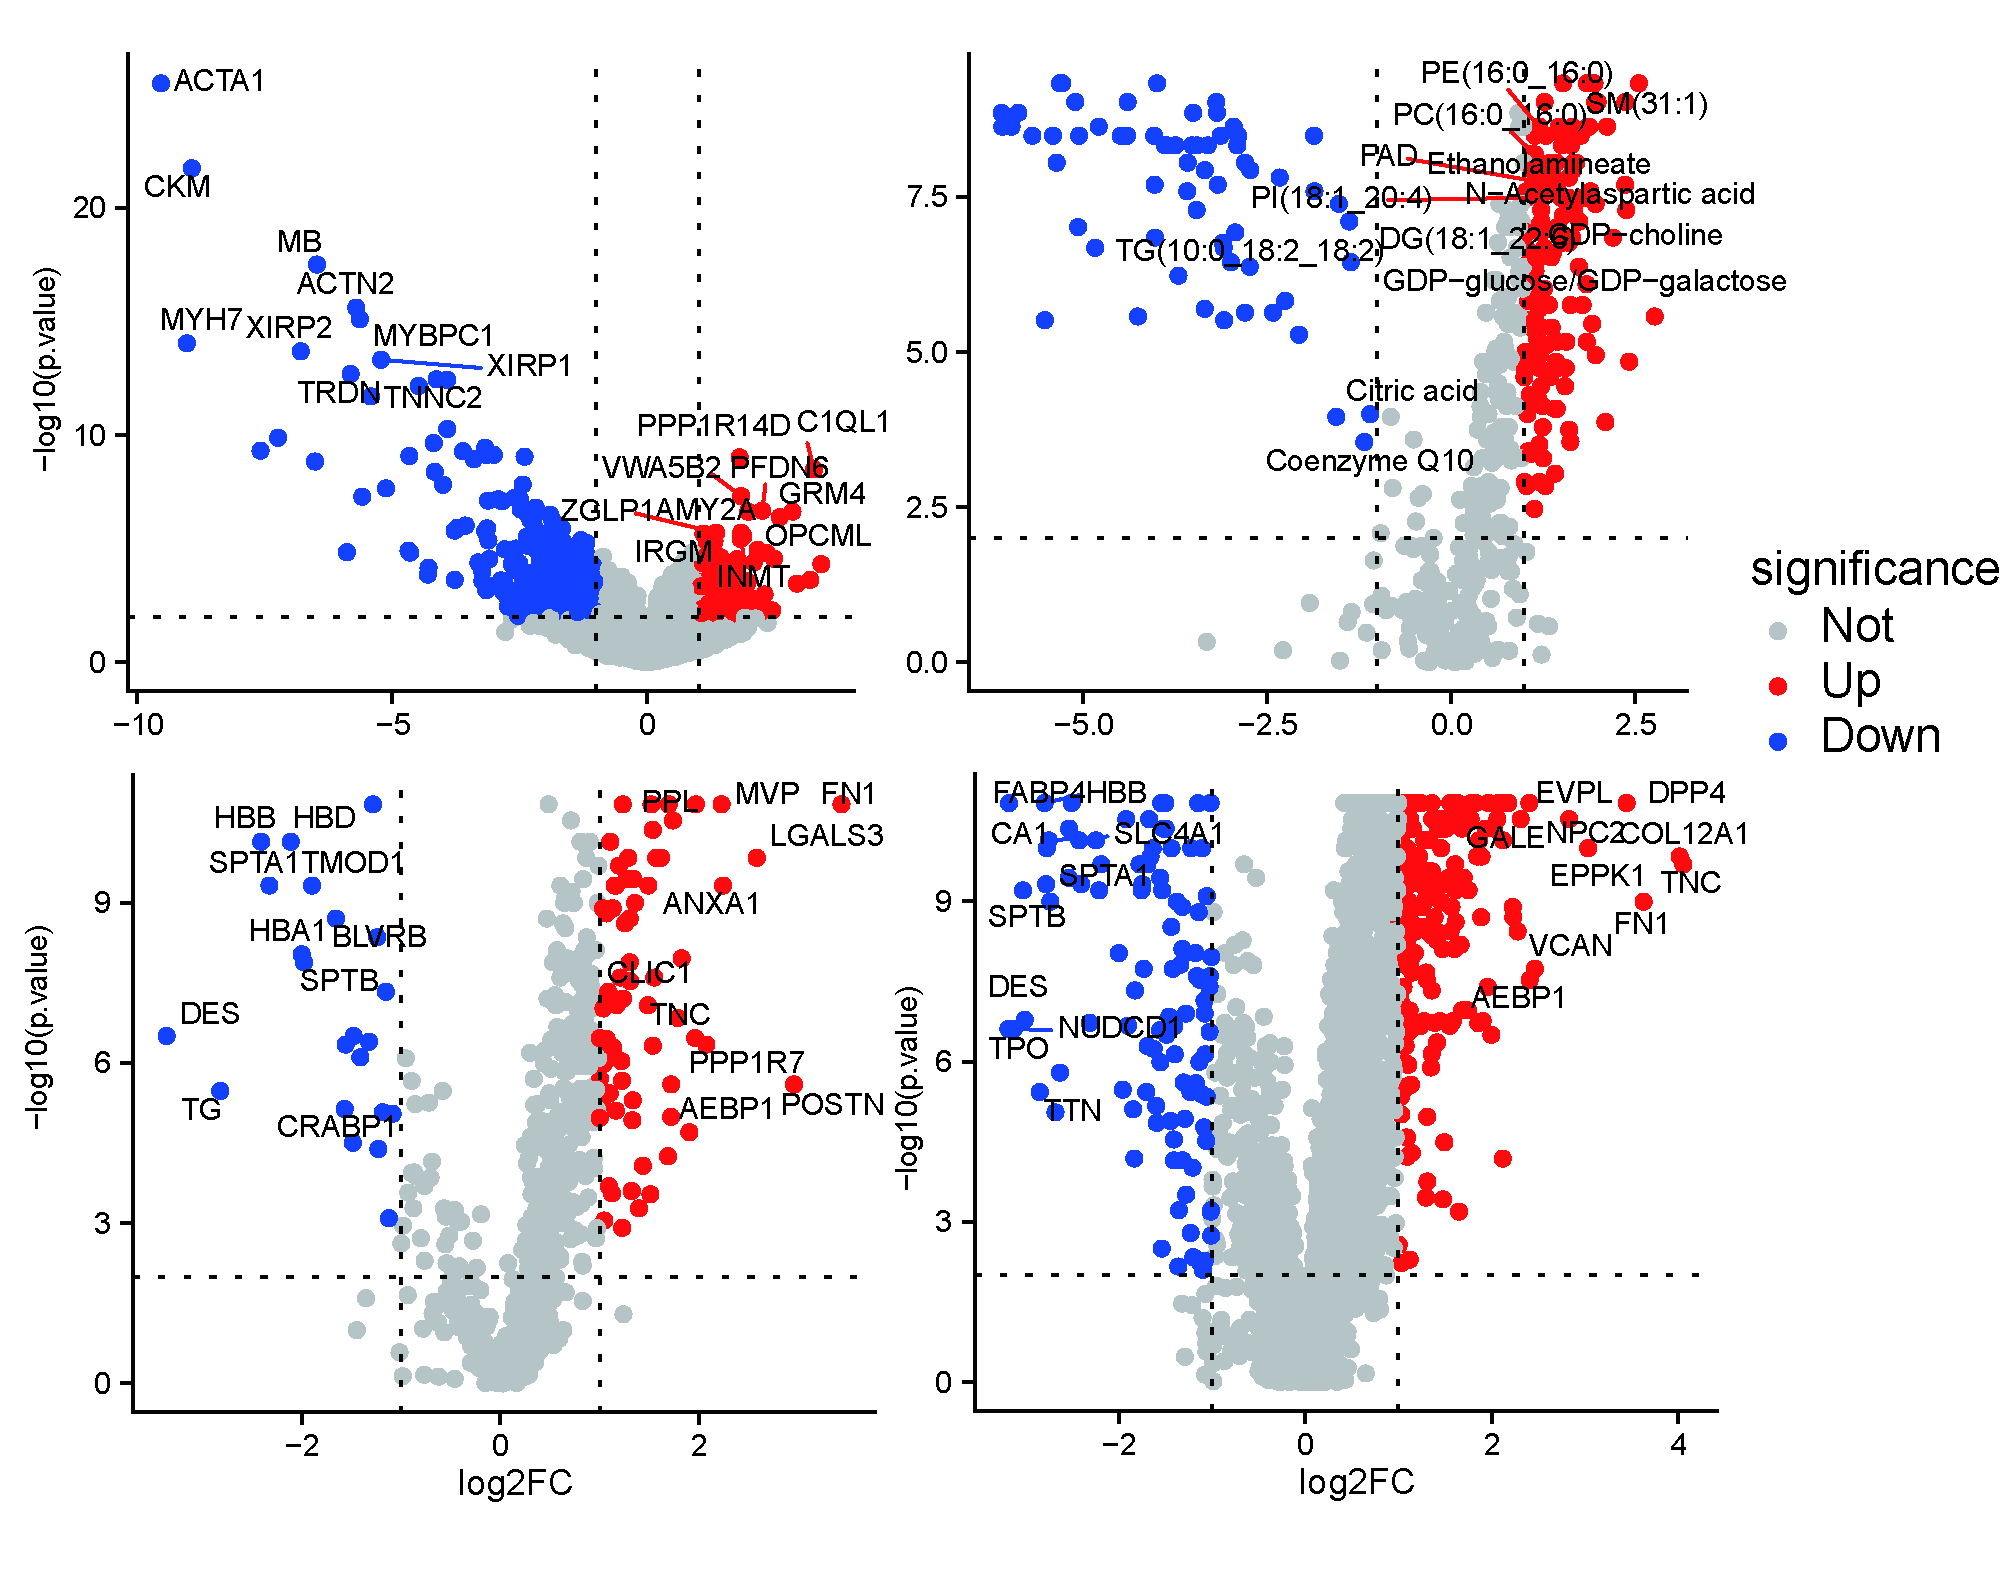


**Fig S2. Differentially expressed molecules (DEMs) identified based on the multi-omics.**

a. Differential expression analysis results for mRNA.

b.Differential expression analysis results for metabolite.c.Differential expression analysis results for Phosph protein.d.Differential expression analysis results for protein.


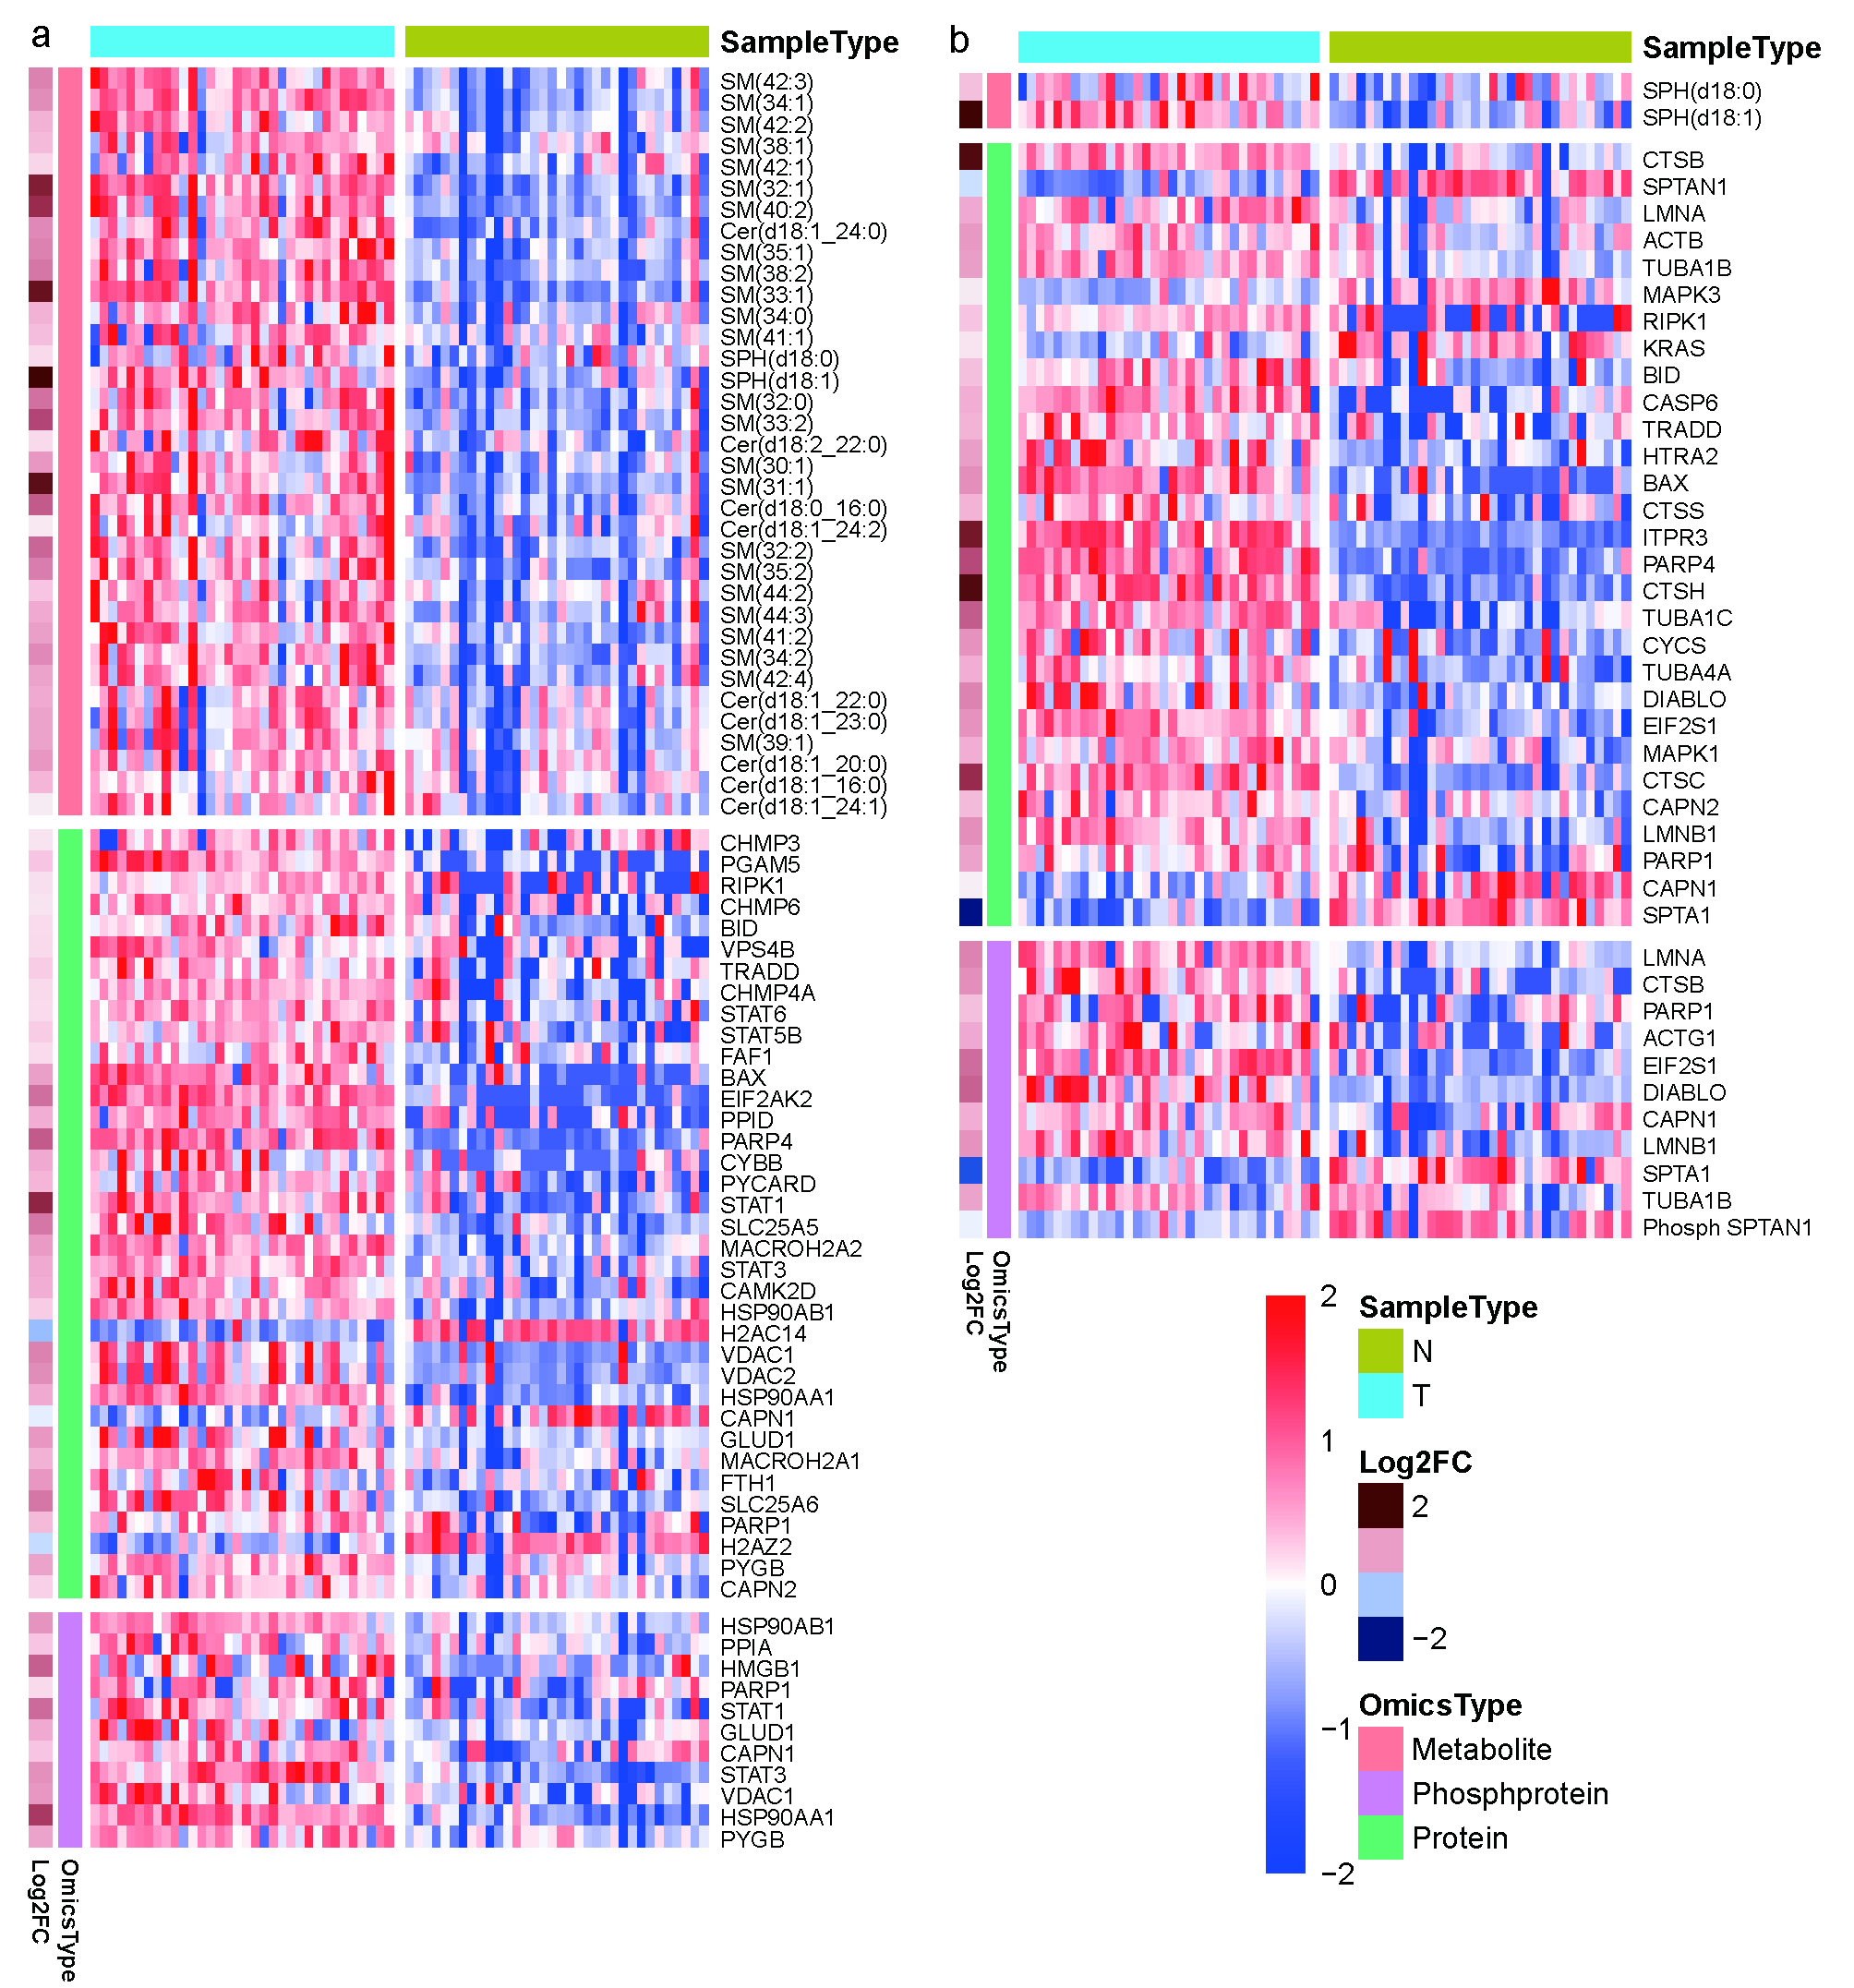


**Fig S3. The expressional profiles of the differentially expressed molecules.**

a-b. The expressional profiles of the differentially expressed molecules in necroptosis (a) and apoptosis (b) pathways.


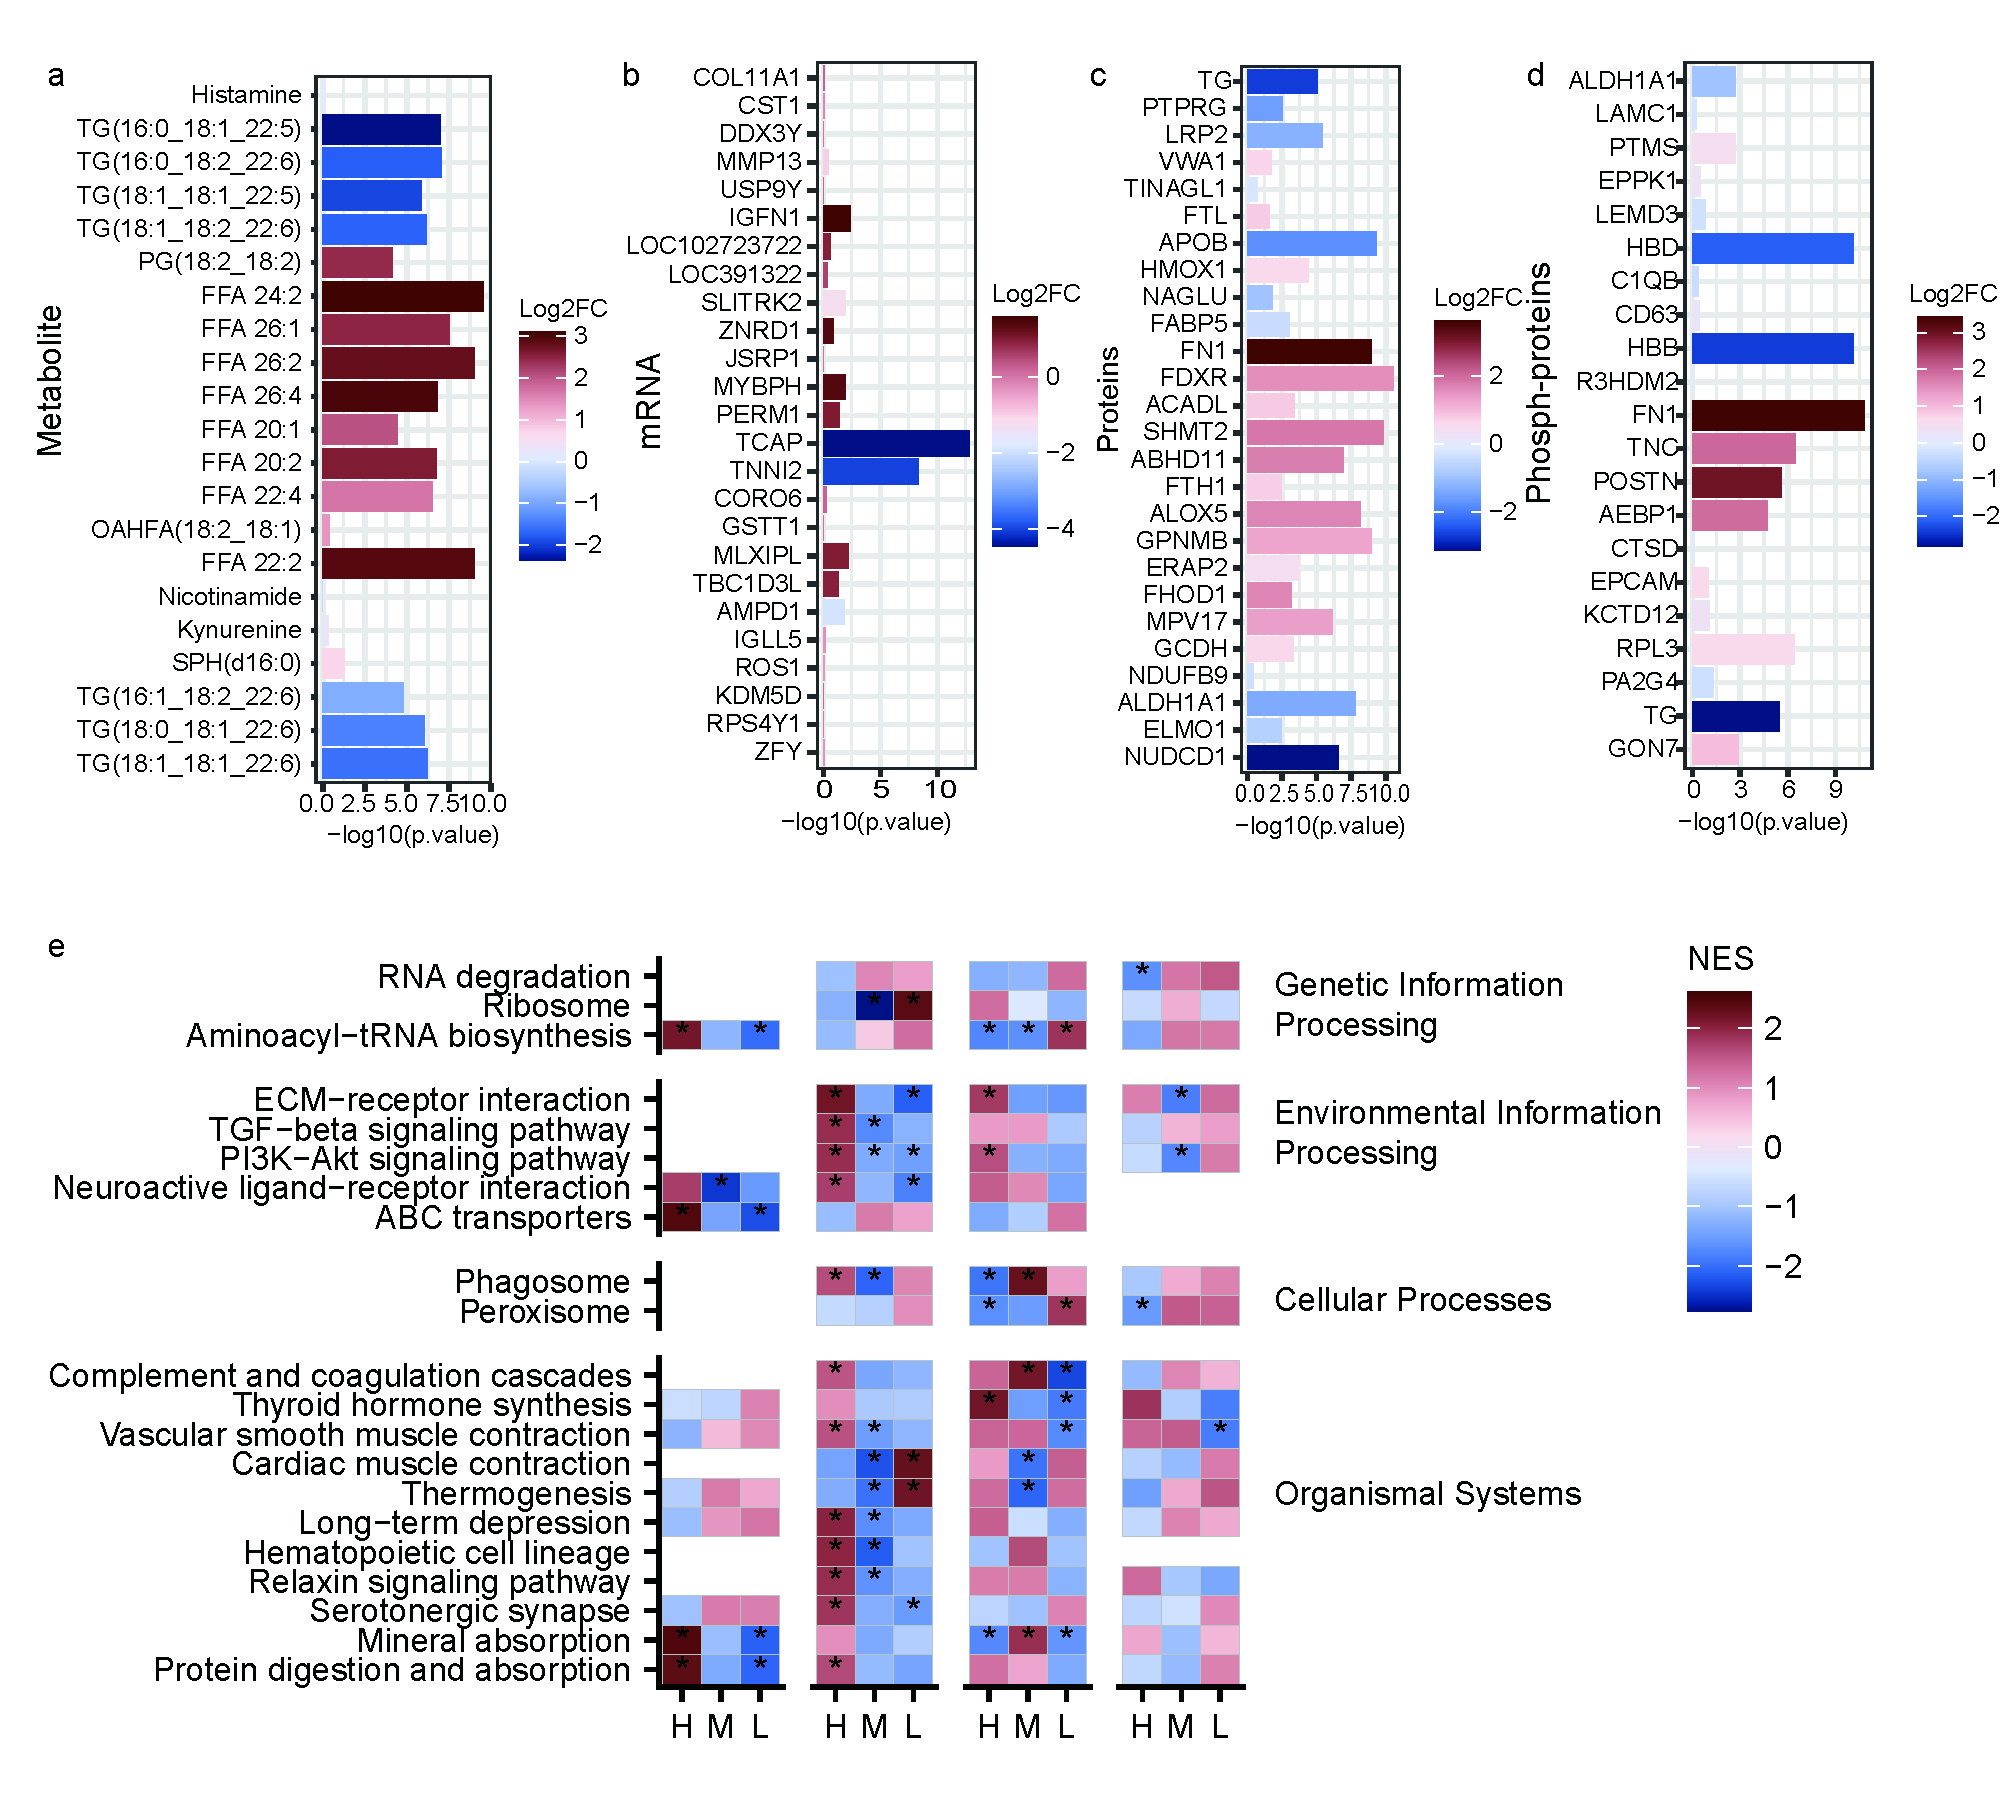


**Fig S4. Recurrence risk relevant molecular and pathway characteristics.**

a. The differential expressions between tumor and normal samples for the recurrence risk relevant molecules.

b. The GSEA pathway enrichment results for PTC with different recurrence risks in addition to metabolism pathways. The results for metabolism pathways were included in Fig 3e.

**
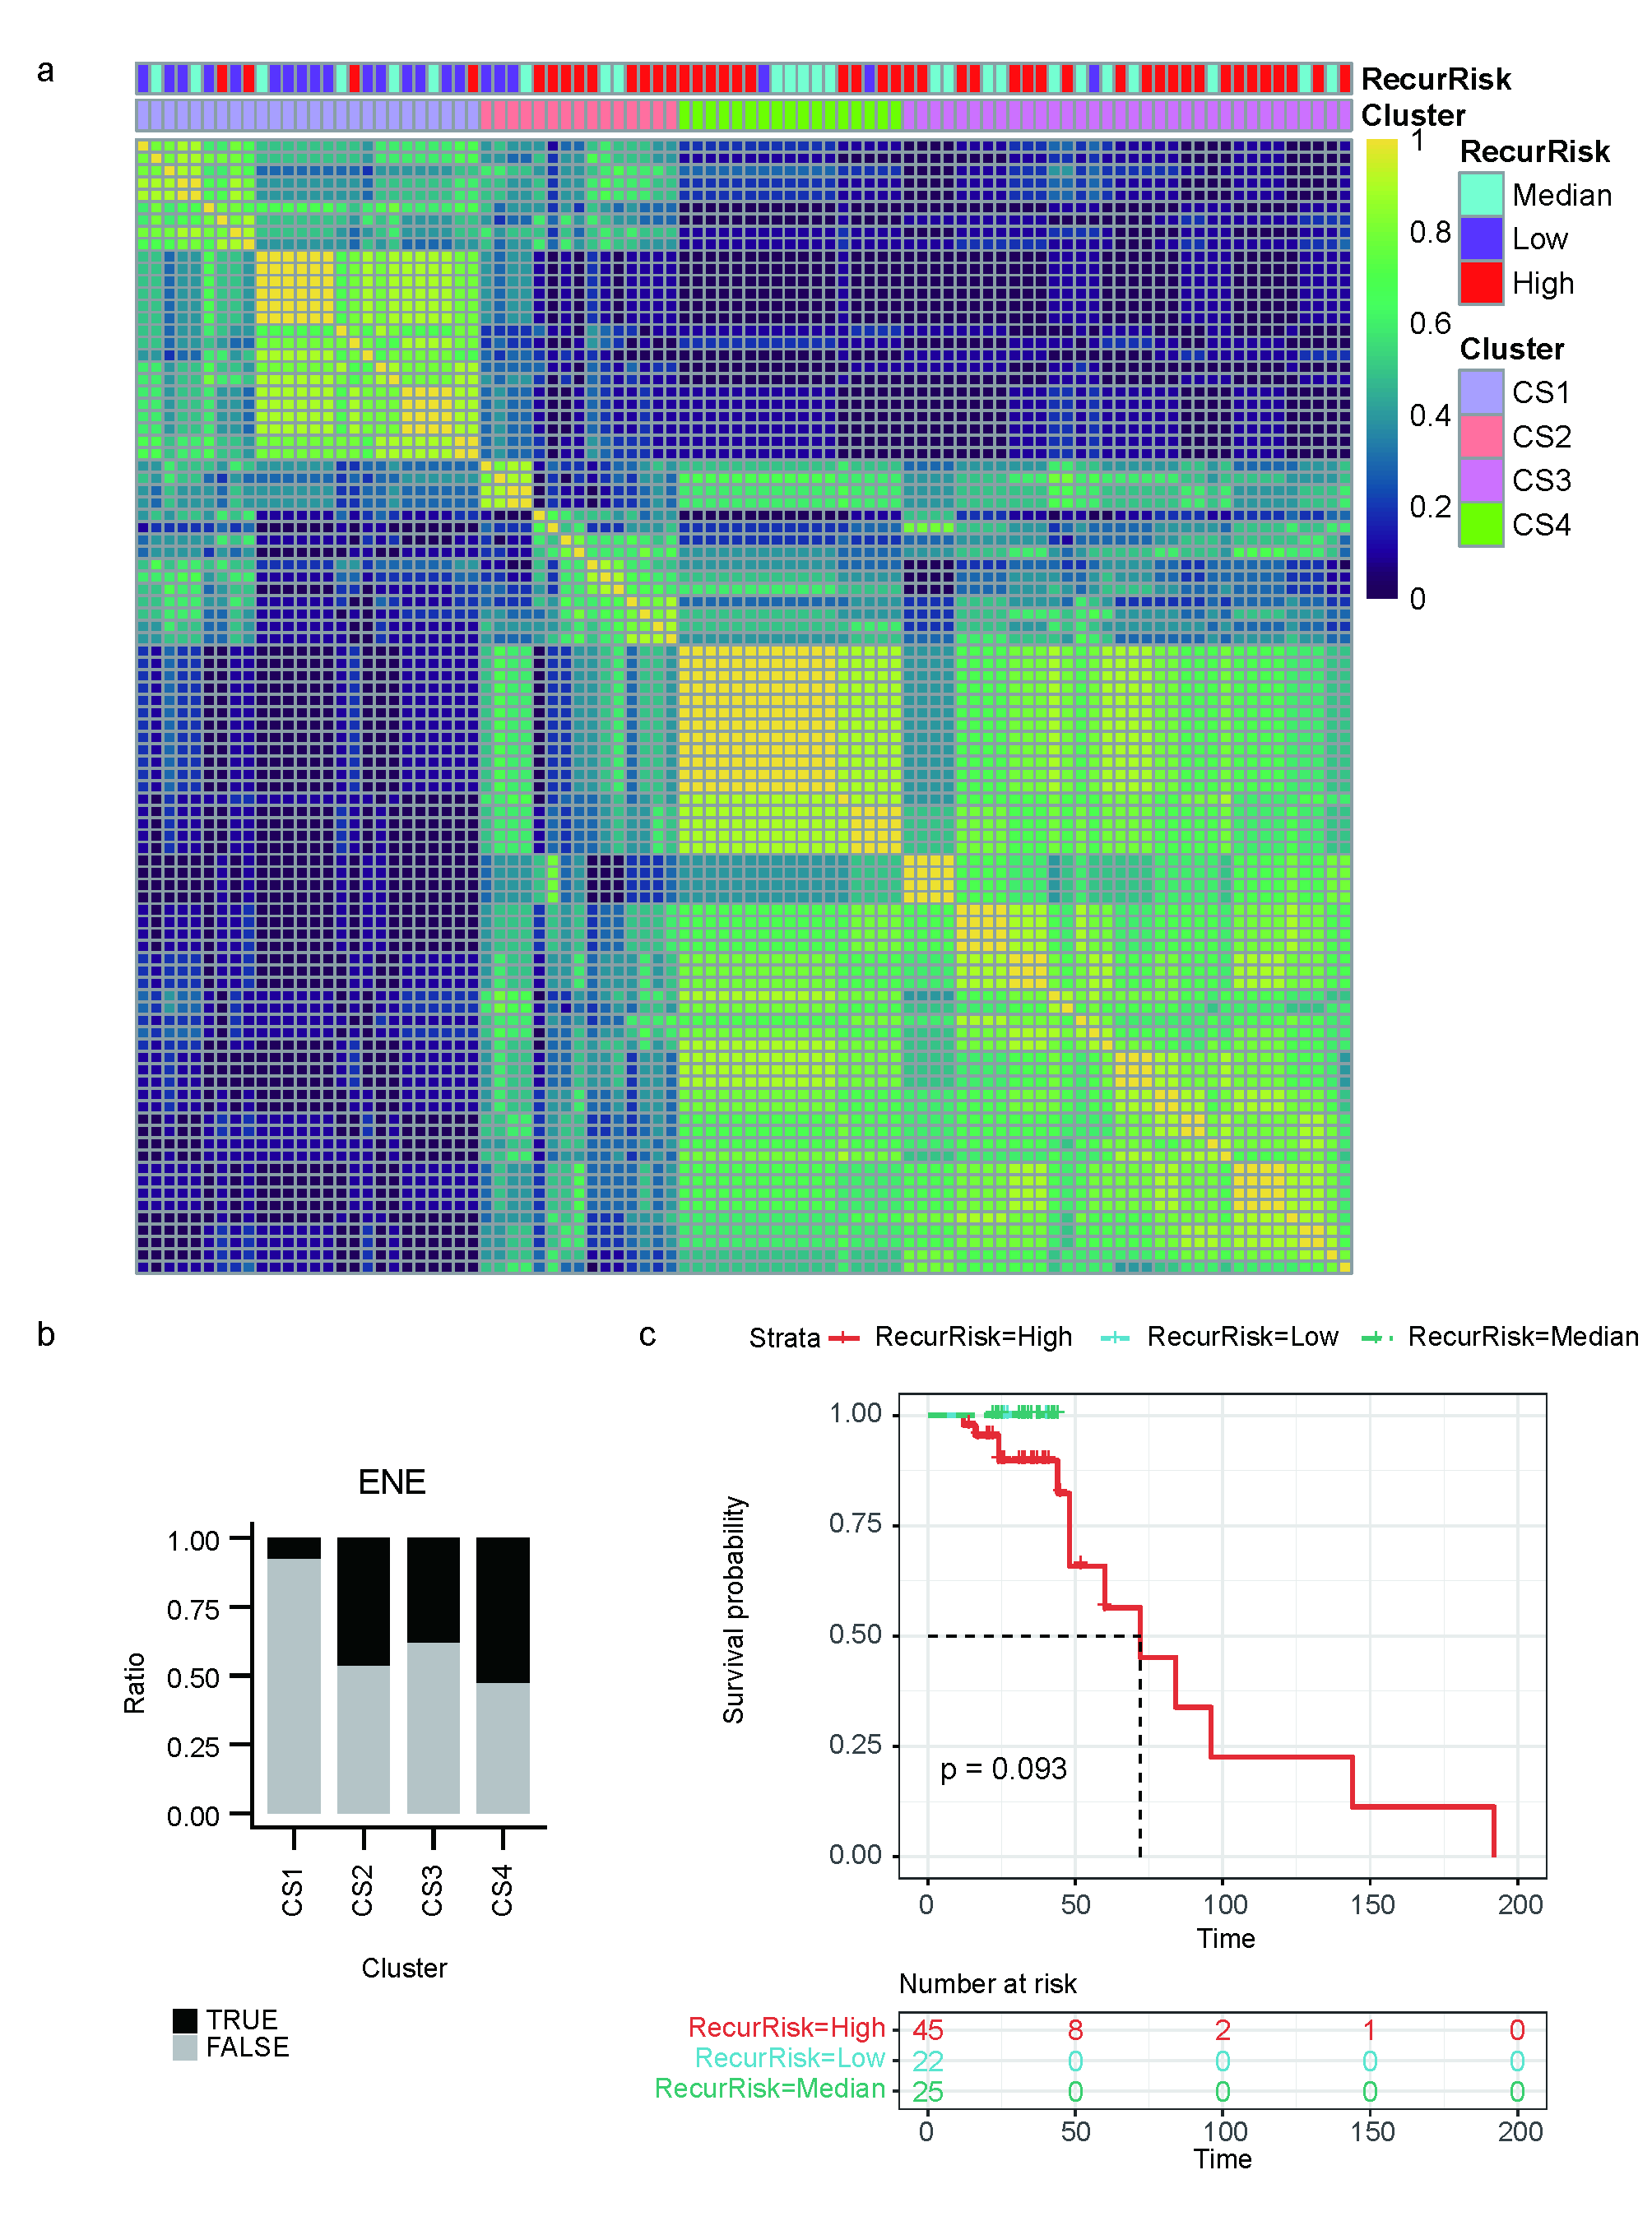
**

**Fig S5. Clustering the patients based on the transcriptome and metabolome.**

a. Heatmap of the sample similarity matrix.

b. The the ratio of patients with and without ENE across the four subtypes.

c. KM-plot of the recurrence-free survival of patients stratified as high, intermediate and low recurrence risks.

**
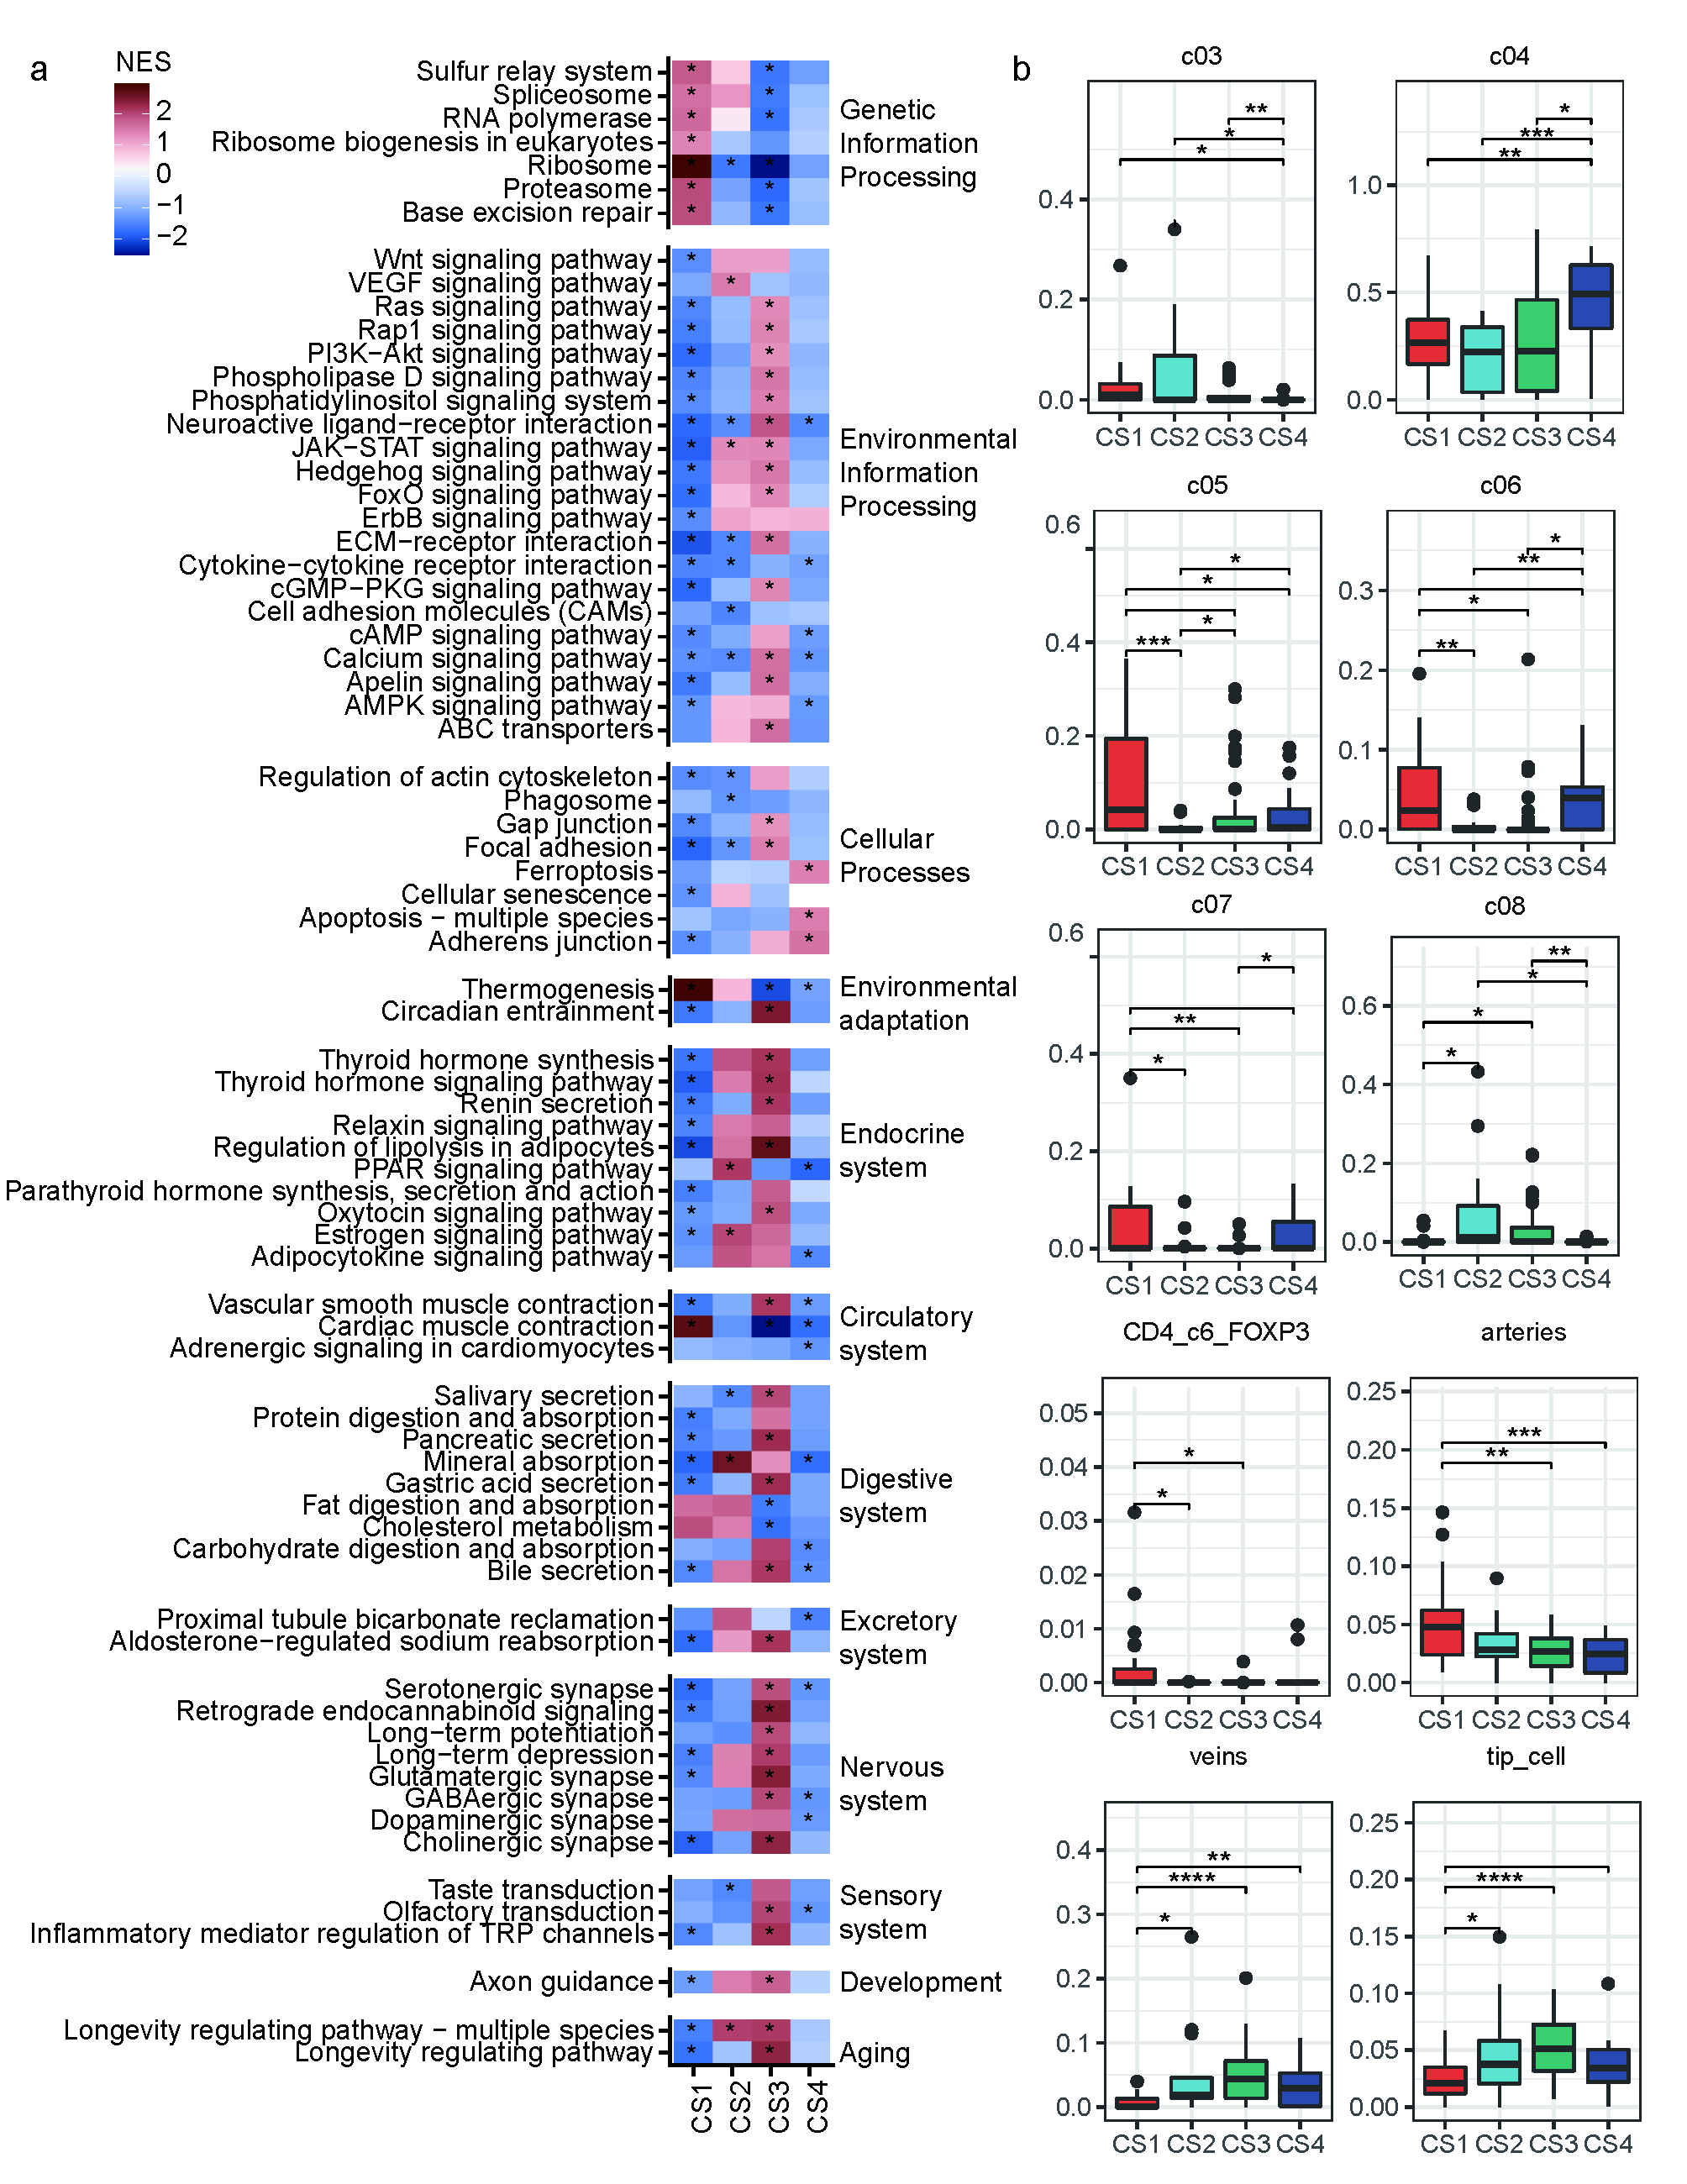
**

**Fig S6. Pathway and cellular characterization of the four re-defined sub-types.**

a. The GSEA pathway enrichment results for differet sub-types based on transcriptomics data. The results for metabolism and immune pathways were included in Fig 6h-6i.

b. Box plot of the differential cell compositions of the four sub-types. Wilcox-Test, un-paired.


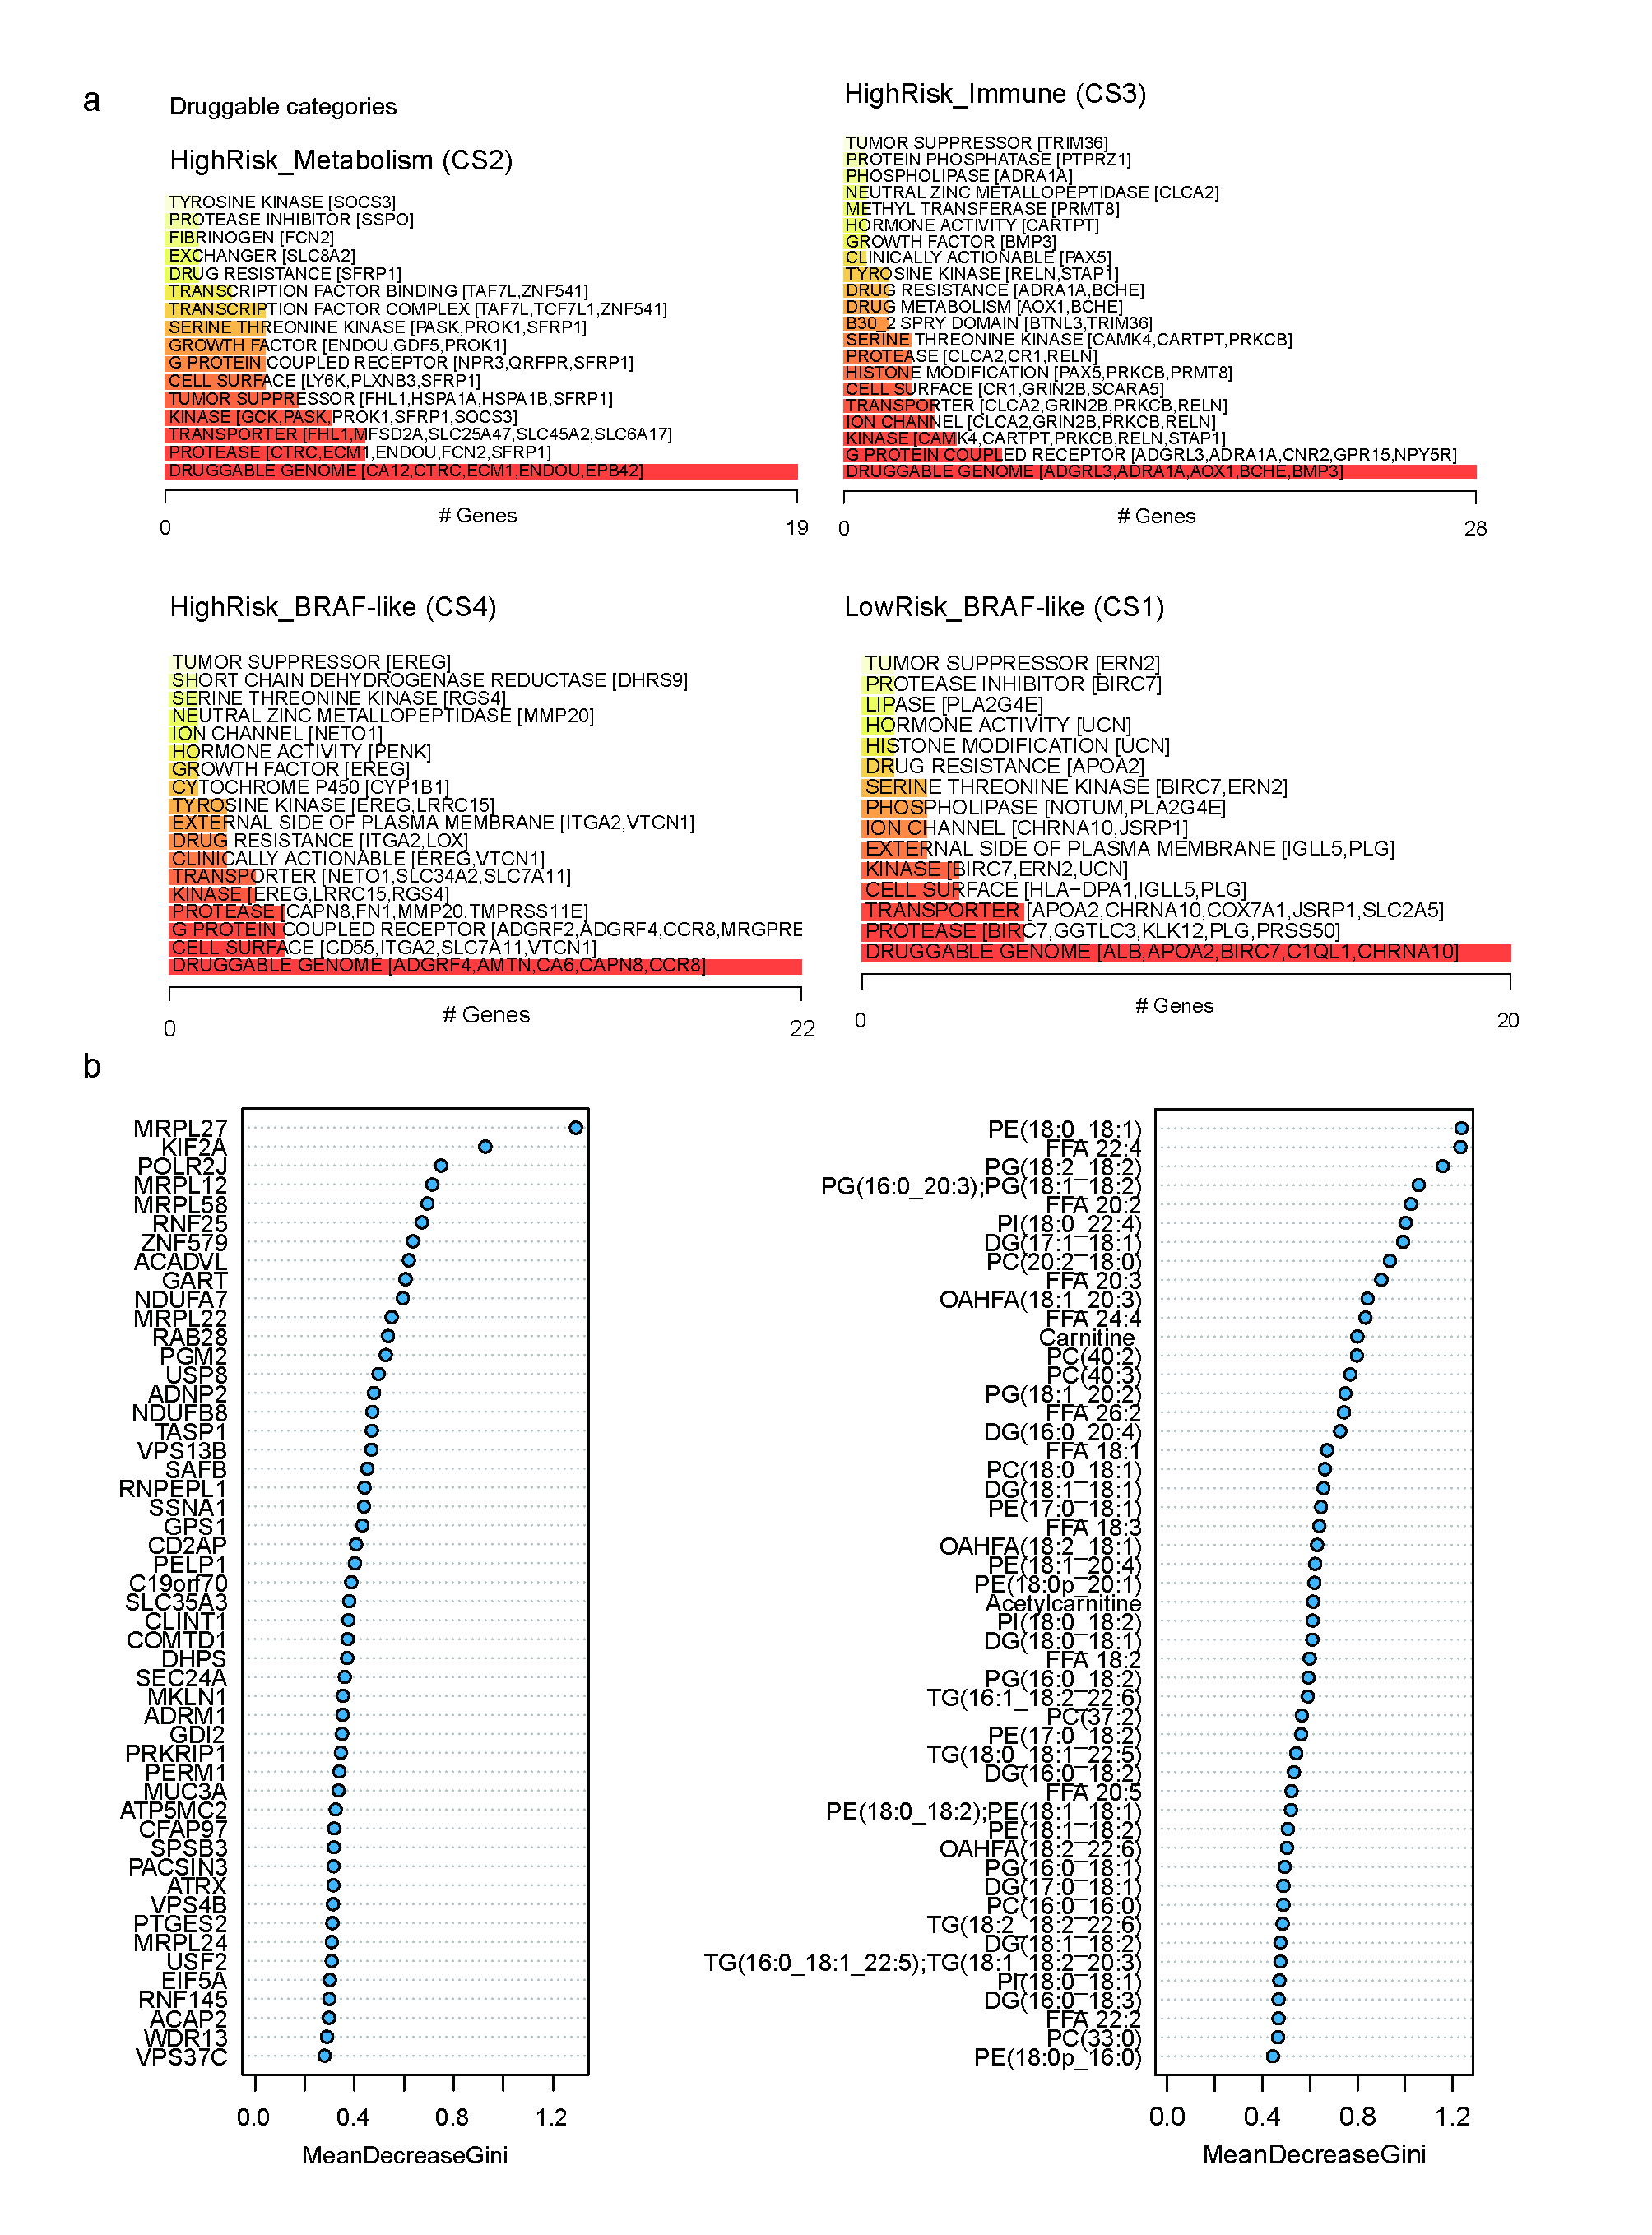


**Fig S7. Potential targets of the four subtypes.**

a. Druggable targets of the four subtypes.

b-c. Top-ranked genes and metabolites in predicting the four-subtypes based on random forest method.
